# Supplementary material
Source: MDPI journal article supplement (https://www.mdpi.com/2071-1050/14/2/919)
Supplement: s1 [file s1]

# Investigations of metal pollution in road dust of steel industrial area and application of magnetic separation

Hyeryeong Jeong <sup>1,2</sup> and Kongtae Ra <sup>1,2,\*</sup>

<sup>1</sup> Marine Environmental Research Center, Korea Institute of Ocean Science and Technology (KIOST), Busan 49111, Republic of Korea; hrjeong@kiost.ac.kr

<sup>2</sup> Department of Ocean Science (Oceanography), KIOST School, University of Science and Technology (UST), Daejeon 34113, Republic of Korea

\* Correspondence: ktra@kiost.ac.kr

**Table S1.** Correlation matrix for metals concentrations in magnetic road dust. Bold indicates that correlation is significant at the 0.05 level.

|    | Al           | Fe           | Li           | Ti          | V           | Cr          | Mn    | Co    | Ni    | Cu          | Zn          | As          | Mo          | Cd          | Sn          | Sb          | Pb   | Hg |
|----|--------------|--------------|--------------|-------------|-------------|-------------|-------|-------|-------|-------------|-------------|-------------|-------------|-------------|-------------|-------------|------|----|
| Al | -            |              |              |             |             |             |       |       |       |             |             |             |             |             |             |             |      |    |
| Fe | <b>-0.72</b> | -            |              |             |             |             |       |       |       |             |             |             |             |             |             |             |      |    |
| Li | <b>0.46</b>  | <b>-0.46</b> | -            |             |             |             |       |       |       |             |             |             |             |             |             |             |      |    |
| Ti | <b>0.60</b>  | -0.42        | 0.04         | -           |             |             |       |       |       |             |             |             |             |             |             |             |      |    |
| V  | 0.42         | -0.12        | -0.19        | <b>0.71</b> | -           |             |       |       |       |             |             |             |             |             |             |             |      |    |
| Cr | -0.18        | 0.09         | <b>-0.50</b> | 0.36        | 0.39        | -           |       |       |       |             |             |             |             |             |             |             |      |    |
| Mn | 0.29         | 0.17         | -0.40        | <b>0.50</b> | <b>0.78</b> | 0.49        | -     |       |       |             |             |             |             |             |             |             |      |    |
| Co | 0.12         | 0.02         | 0.20         | 0.02        | -0.08       | -0.11       | -0.13 | -     |       |             |             |             |             |             |             |             |      |    |
| Ni | <b>-0.65</b> | 0.38         | -0.37        | -0.15       | -0.32       | <b>0.61</b> | -0.13 | 0.03  | -     |             |             |             |             |             |             |             |      |    |
| Cu | -0.30        | 0.24         | 0.23         | -0.04       | -0.42       | -0.23       | -0.32 | -0.00 | 0.29  | -           |             |             |             |             |             |             |      |    |
| Zn | -0.12        | -0.03        | 0.39         | 0.12        | -0.19       | -0.05       | -0.20 | -0.12 | 0.34  | <b>0.72</b> | -           |             |             |             |             |             |      |    |
| As | 0.30         | -0.26        | -0.05        | 0.44        | <b>0.64</b> | 0.32        | 0.40  | -0.09 | -0.19 | -0.18       | -0.10       | -           |             |             |             |             |      |    |
| Mo | 0.11         | -0.03        | -0.03        | <b>0.58</b> | <b>0.70</b> | 0.22        | 0.27  | 0.23  | -0.74 | -0.10       | -0.06       | <b>0.53</b> | -           |             |             |             |      |    |
| Cd | -0.13        | 0.02         | -0.05        | -0.08       | 0.09        | 0.10        | 0.00  | -0.08 | 0.10  | 0.22        | 0.33        | <b>0.53</b> | -0.04       | -           |             |             |      |    |
| Sn | 0.15         | -0.06        | 0.10         | <b>0.57</b> | <b>0.52</b> | 0.10        | 0.31  | -0.03 | 0.01  | 0.41        | <b>0.50</b> | 0.29        | <b>0.64</b> | 0.07        | -           |             |      |    |
| Sb | 0.06         | -0.10        | 0.12         | 0.33        | 0.12        | -0.10       | -0.08 | -0.03 | 0.10  | <b>0.58</b> | <b>0.59</b> | 0.08        | 0.30        | 0.40        | <b>0.70</b> | -           |      |    |
| Pb | -0.08        | 0.04         | 0.29         | 0.12        | -0.04       | -0.03       | -0.01 | -0.08 | 0.30  | <b>0.68</b> | <b>0.92</b> | -0.02       | 0.02        | 0.43        | <b>0.63</b> | <b>0.73</b> | -    |    |
| Hg | -0.12        | -0.00        | -0.08        | -0.13       | 0.16        | 0.22        | 0.07  | -0.10 | 0.02  | -0.06       | 0.09        | <b>0.64</b> | -0.05       | <b>0.89</b> | -0.12       | 0.00        | 0.13 | -  |
